# Supplementary material for: Intact quantitation and evaluation of a PEG-glycosulfopeptide as a therapeutic P-selectin antagonist
Source: Royal Society of Chemistry journal article supplement (doi:10.1039/d4ra05000b), 2024-01-01

## Supporting Information

### Intact Quantitation and Evaluation of a PEG-Glycosulfopeptide as a Therapeutic P-Selectin Antagonist

Diane D. Park<sup>1,2</sup>, Simon S. Park<sup>1,2</sup>, Erbin Dai<sup>1,2</sup>, Carolyn A. Haller<sup>1,2</sup>, Daniel J. Wong<sup>1,2</sup>, Walter J. Wever<sup>1,2</sup>, Richard D. Cummings<sup>1,3</sup>, Elliot L. Chaikof<sup>1,2,3,4\*</sup>

<sup>1</sup>Department of Surgery, Beth Israel Deaconess Medical Center, Harvard Medical School, 330 Brookline Ave, Boston, MA 02215

<sup>2</sup>Wyss Institute for Biologically Inspired Engineering, Harvard University, 3 Blackfan Circle, Boston, MA 02115

<sup>3</sup>Harvard Medical School Center for Glycoscience, Harvard Medical School, Boston, MA 02215

<sup>4</sup>Division of Health Sciences and Technology, Massachusetts Institute of Technology, Cambridge, MA 02139

**\*Address correspondence to:**

Elliot L. Chaikof, MD, PhD  
Department of Surgery  
Beth Israel Deaconess Medical Center  
110 Francis Street, Suite 9F  
Boston, MA 02115  
Tel: (617) 632-9581; Fax: (617) 632-9701  
E-mail: [echaikof@bidmc.harvard.edu](mailto:echaikof@bidmc.harvard.edu)

## Supplementary Figures

**Figure S1.** Schematic of the flow path of the ultra-high performance liquid chromatography-mass spectrometry (UHPLC-MS) system designed for the analysis of high molecular mass analytes in aqueous solutions using hydrophilic interaction liquid chromatography (HILIC). (A) Configuration of HILIC-MS during sample loading. (B) Configuration of HILIC-MS during elution and intact MS analysis.

**Figure S2.** Mass spectrometric analysis of PEG10-GSnP-6 under various analytical conditions. Deconvoluted mass spectra of PEG10-GSnP-6 analyzed using (A) butylene carbonate as an additive, (B) 5 mM ammonium acetate/acetic acid (pH 3.8) solvent system with the ion transfer temperature at 275°C, (C) 5 mM ammonium formate/ammonia (pH 8.3) solvent system with MS resolution at 240,000.

**Figure S3.** Analysis of intact, reduced alpha synuclein in solution. (A) Extracted chromatogram using HILIC. (B) Deconvoluted full mass spectrum. (C) Detected charged states using ESI-Orbitrap-MS.

**Figure S4.** Analysis of intact, reduced thioredoxin in solution. (A) Extracted chromatogram using HILIC. (B) Deconvoluted full mass spectrum. (C) Detected charged states using ESI-Orbitrap-MS.

**Figure S5.** Analysis of intact ubiquitin in solution. (A) Extracted chromatogram using HILIC. (B) Deconvoluted full mass spectrum. (C) Detected charged states using ESI-Orbitrap-MS.

**Figure S6.** Analysis of intact aprotinin in solution. (A) Extracted chromatogram using HILIC. (B) Deconvoluted full mass spectrum. (C) Detected charged states using ESI-Orbitrap-MS.

**Figure S7.** Analysis of intact enfuvirtide in solution. (A) Extracted chromatogram using HILIC. (B) Deconvoluted full mass spectrum. (C) Detected charged states using ESI-Orbitrap-MS.

**Figure S8.** Analysis of intact, sulfated big gastrin in solution. (A) Extracted chromatogram using HILIC. (B) Deconvoluted full mass spectrum. (C) Detected charged states using ESI-Orbitrap-MS.

**Figure S9.** Reproducibility of retention times following multiple injections of PEG10-GSnP-6 extracted from spiked plasma.

**Figure S10.** MS/MS spectrum of a native murine plasma protein employing higher-energy collisional dissociation (HCD) with stepped collision energies (20,30,40) in negative mode.

**Figure S11.** MS/MS spectrum of a native murine urine protein employing higher-energy collisional dissociation (HCD) with stepped collision energies (10,20,30) in negative mode.

**Figure S12.** Binding of U-937 cells to human P-selectin-Fc chimera assessed by flow cytometry. Binding was detected by PE-conjugated anti-Fc. (A) Determination of optimal P-selectin-Fc chimera to 300,000 U-937 cells. U-937 cells incubated without P-selectin displayed no binding. (B-C) Inhibition of binding by anti-PSGL-1 (1:5), anti-P-selectin (2 µg), or EDTA (20 mM). Representative histograms are shown from 3 experiments.

Figure S1.

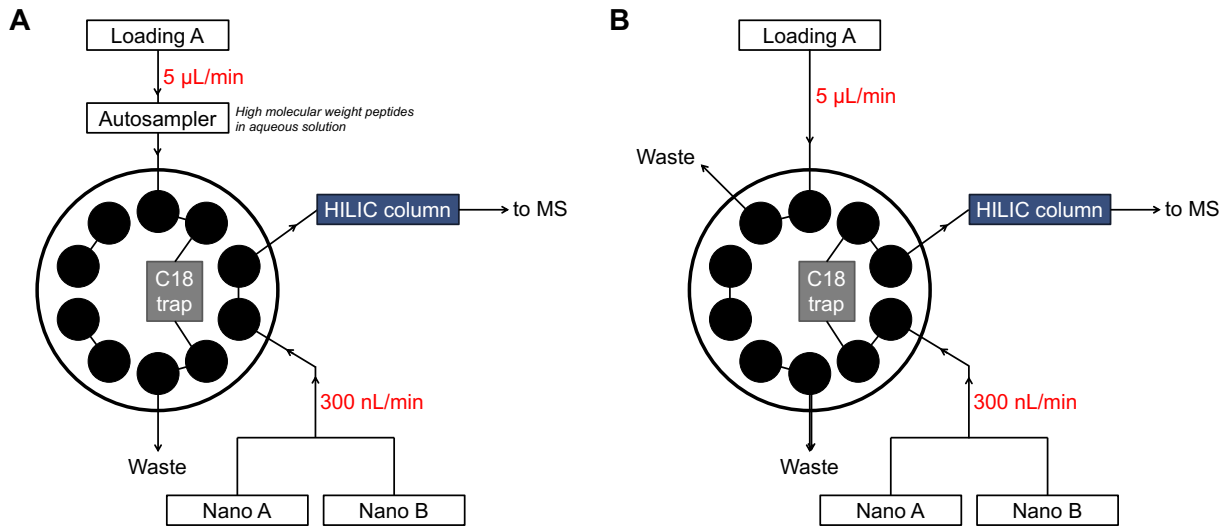

Figure S2.

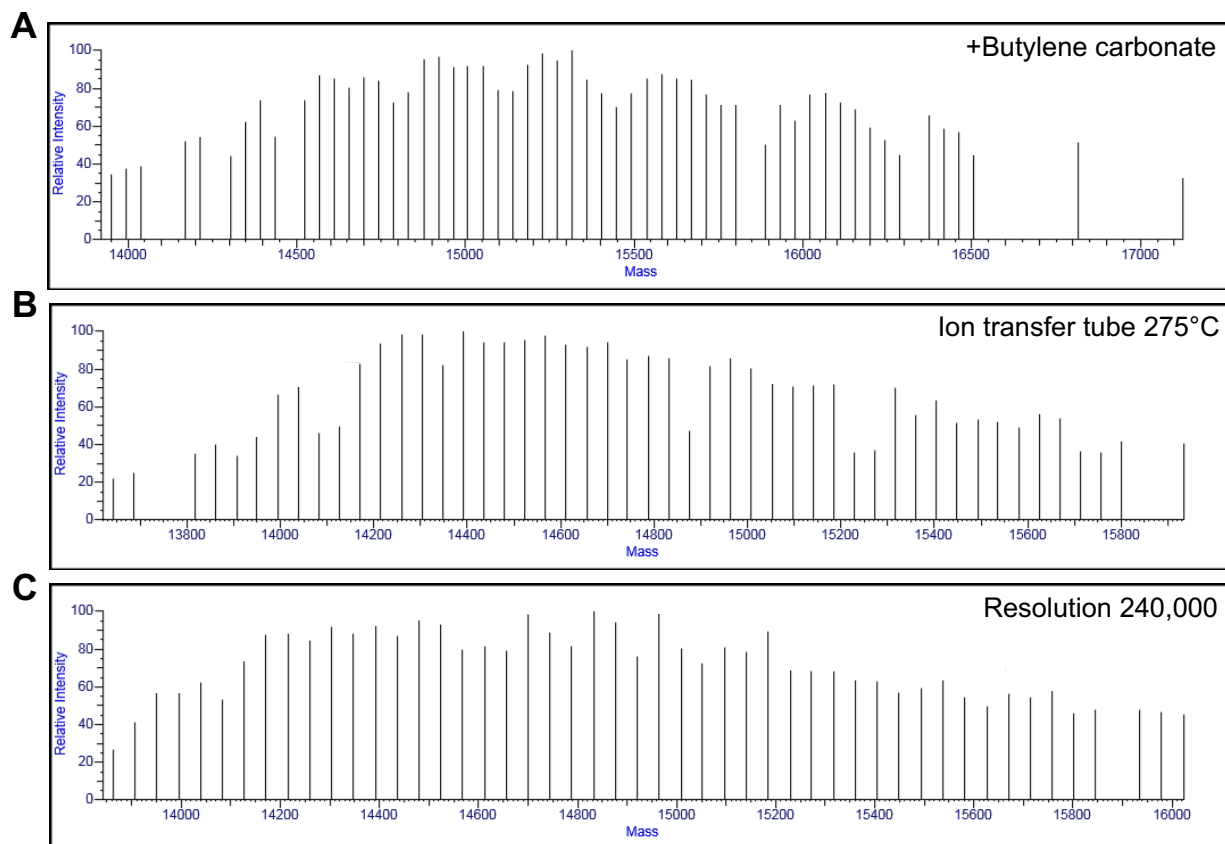

Figure S3.

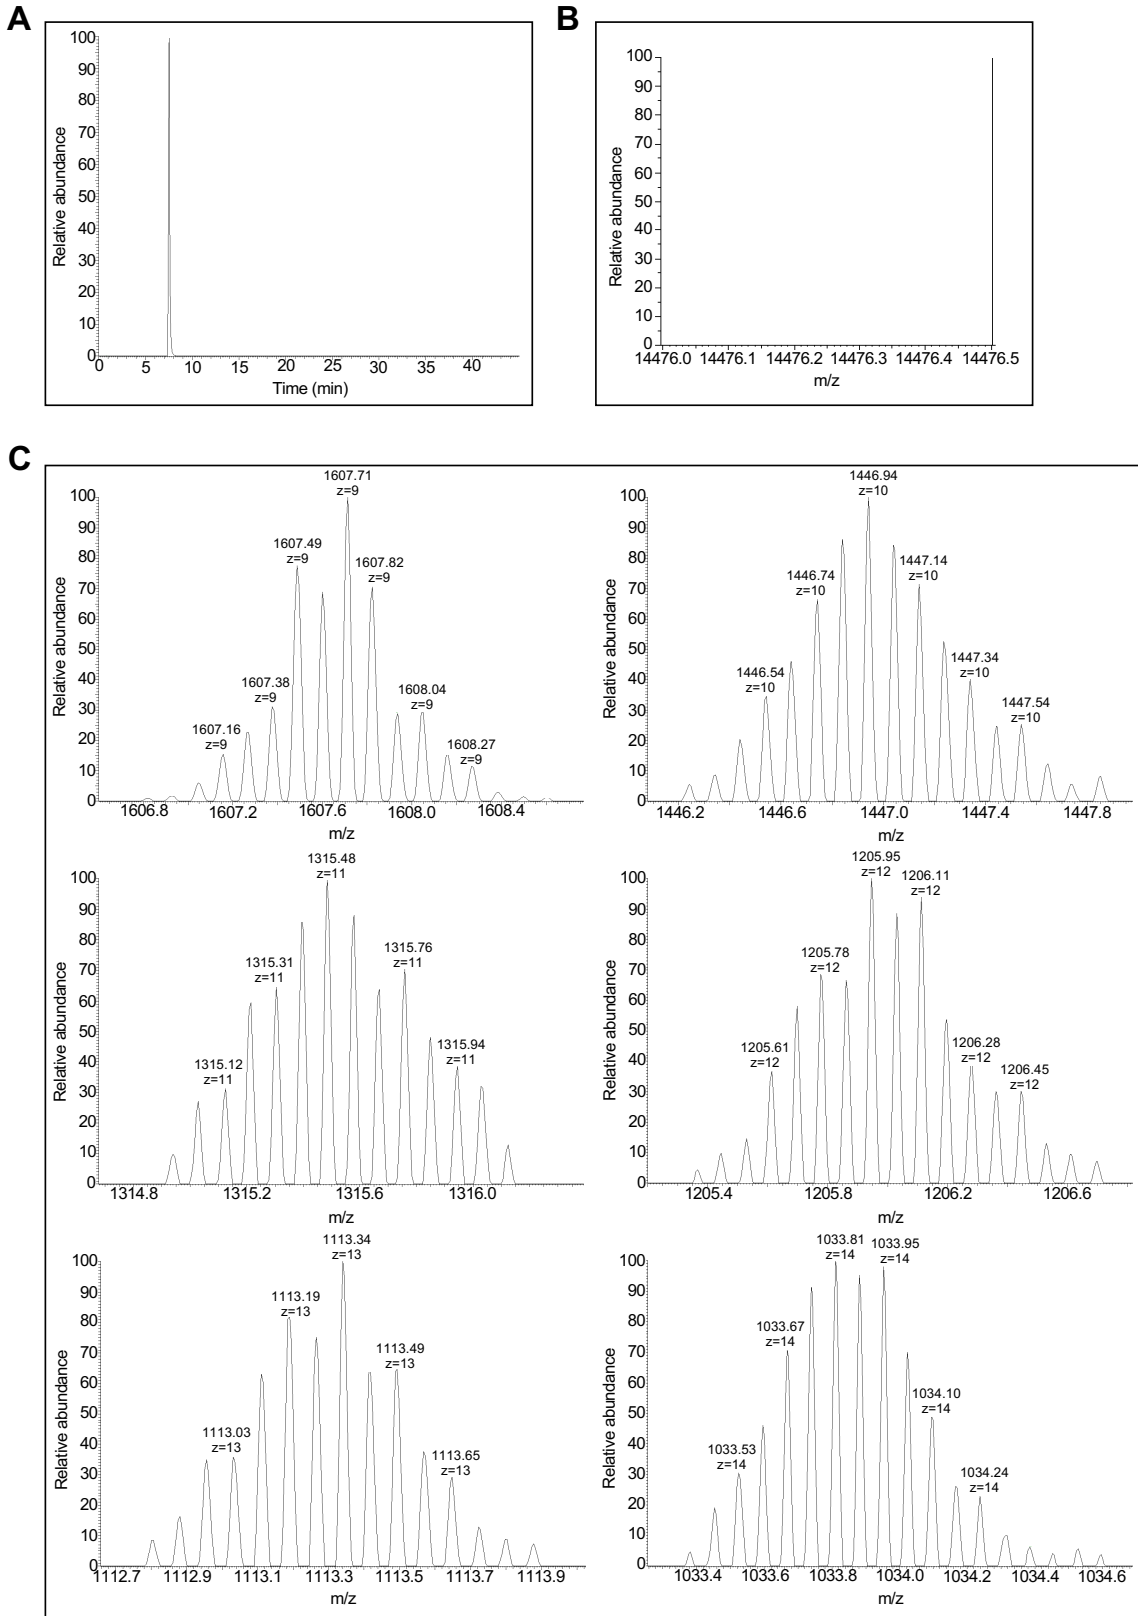

Figure S4.

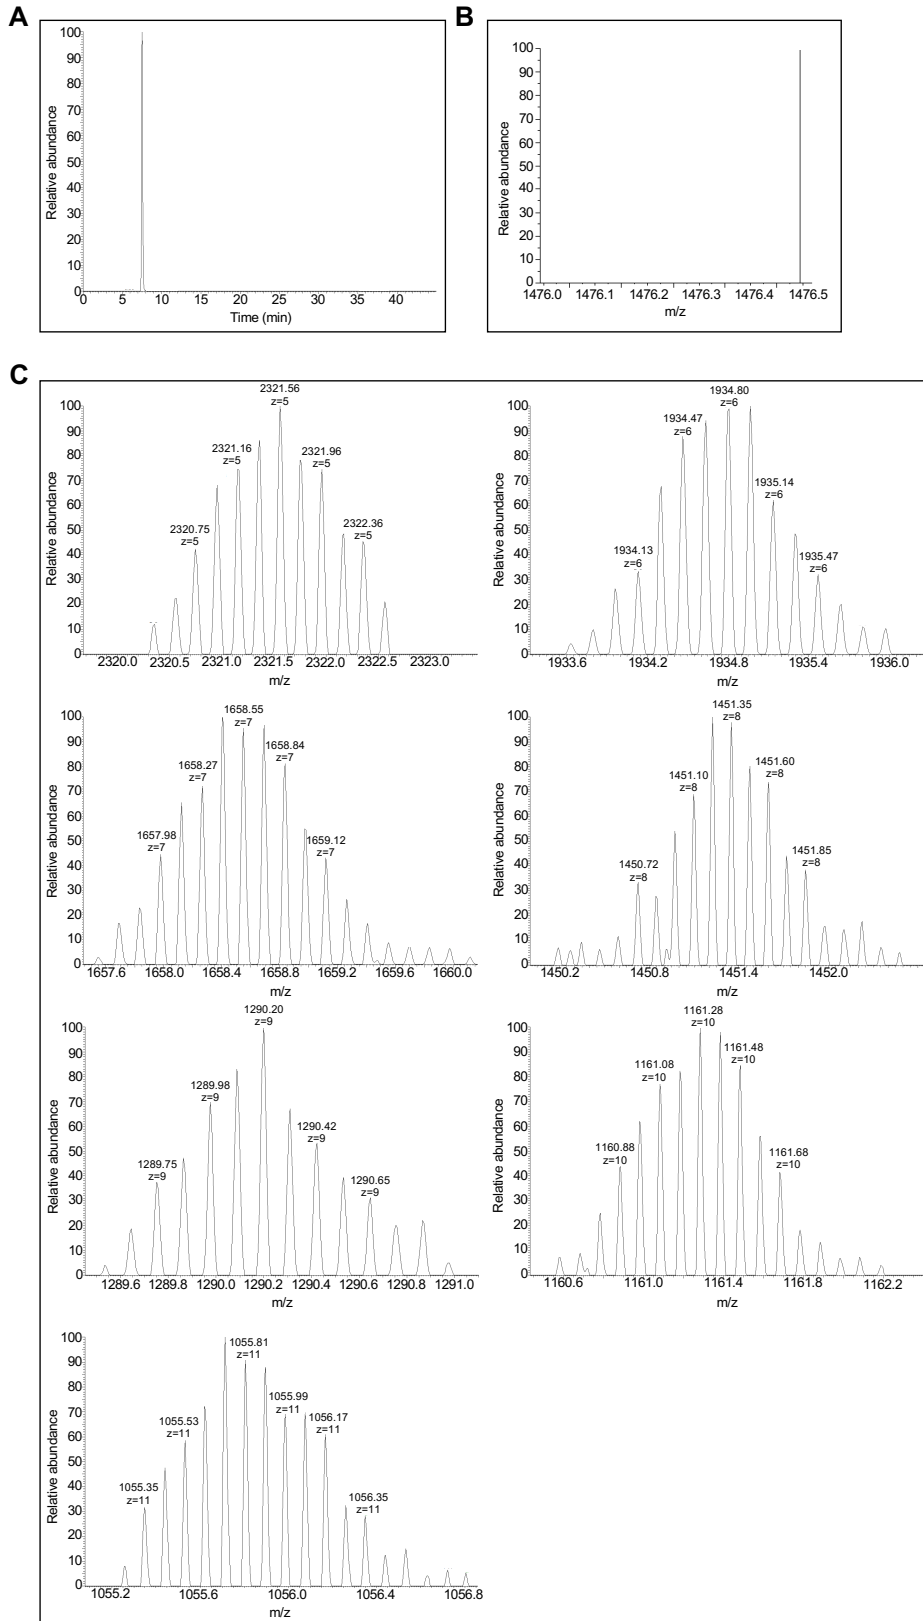

Figure S5.

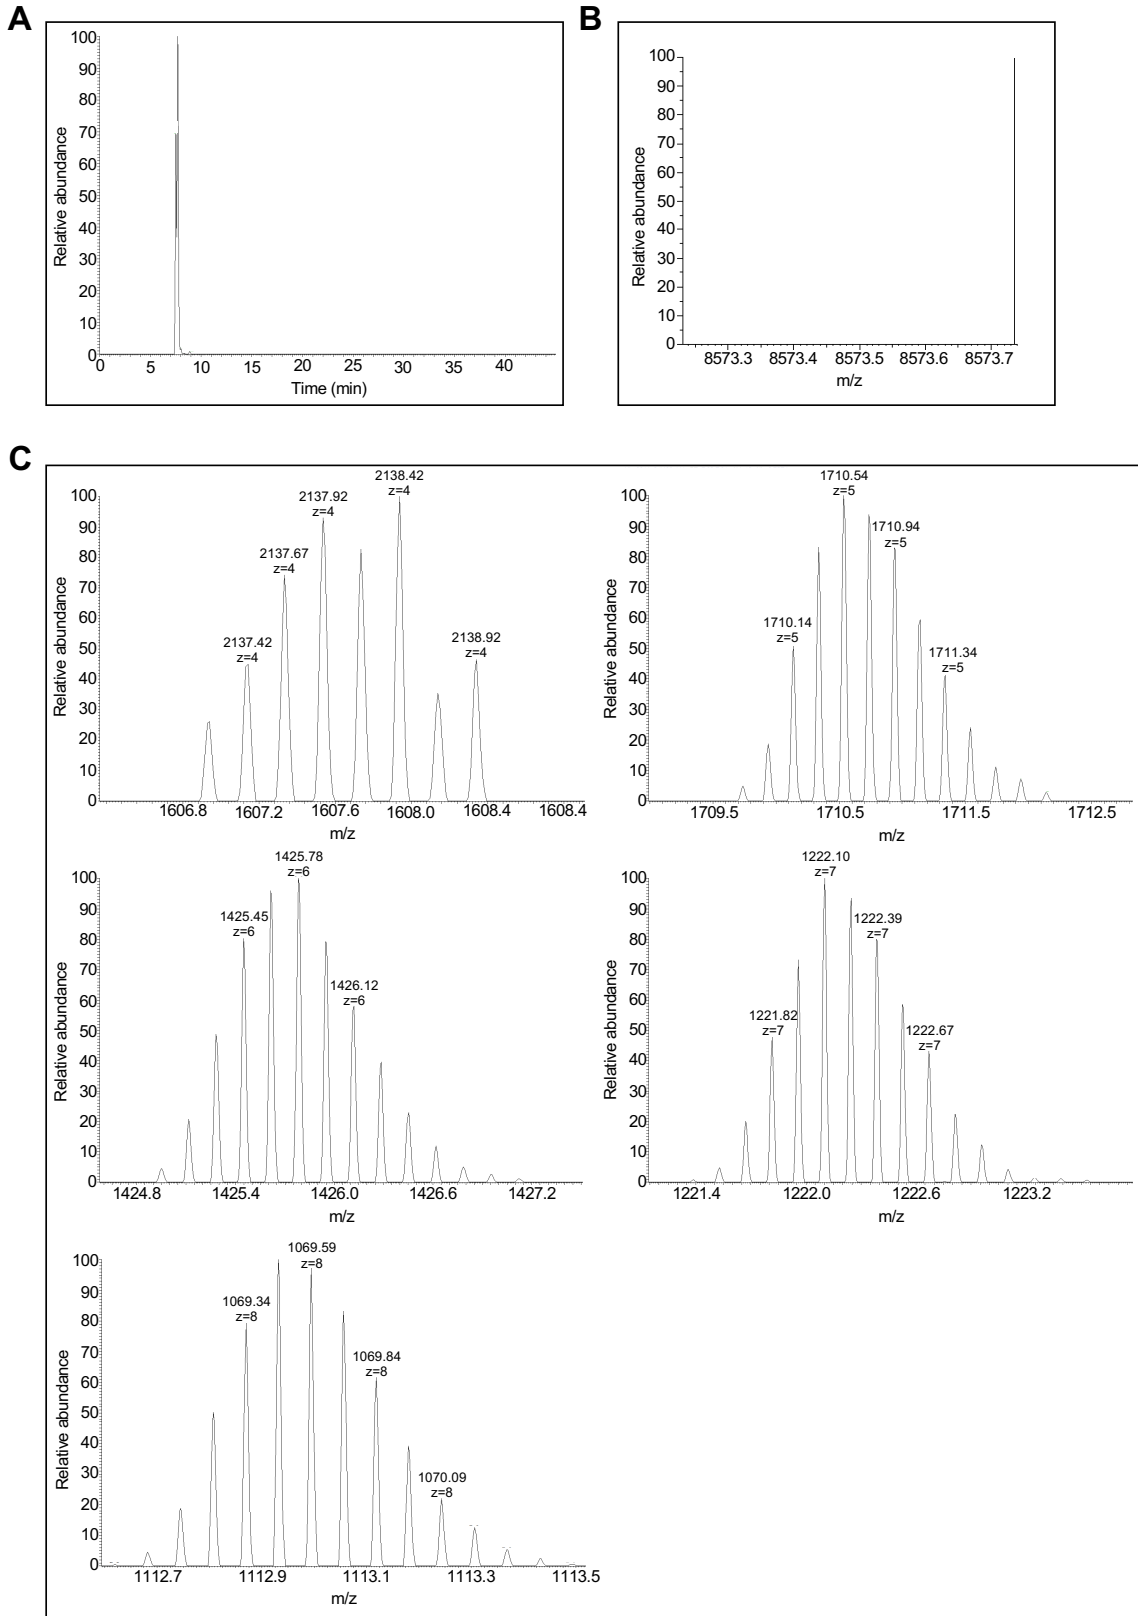

Figure S6.

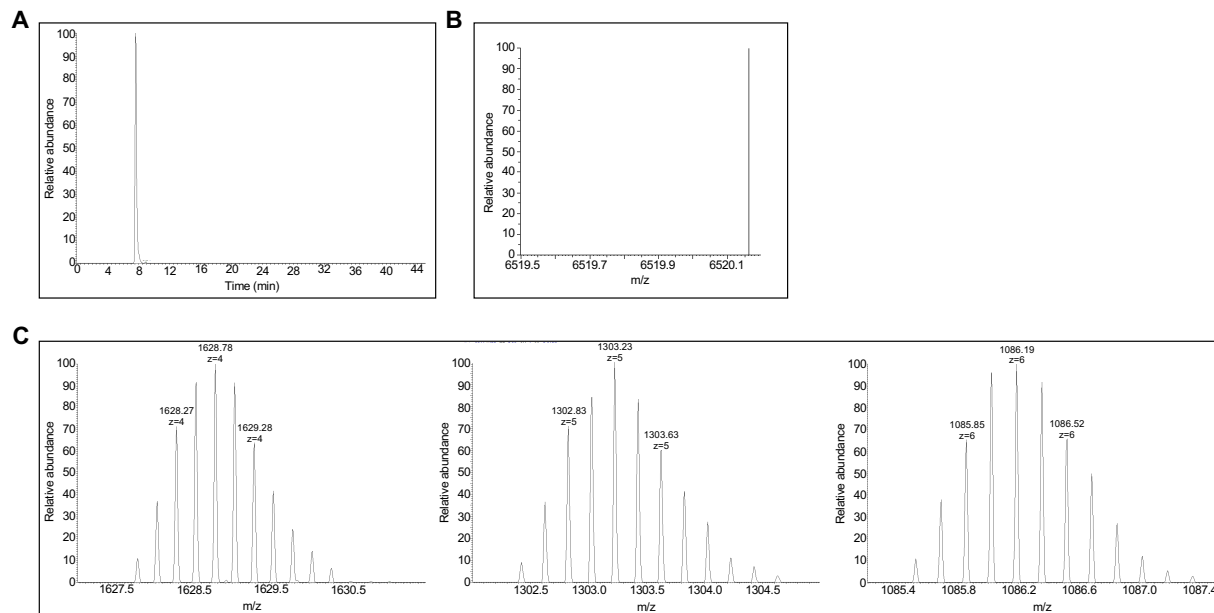



Figure S7.

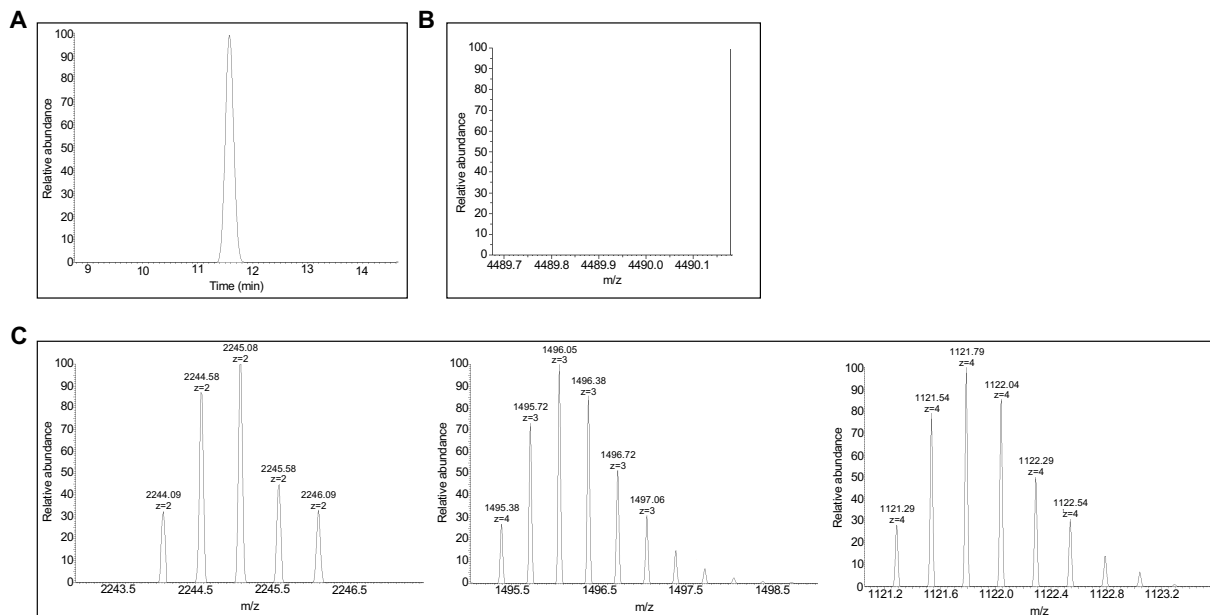

Figure S8.

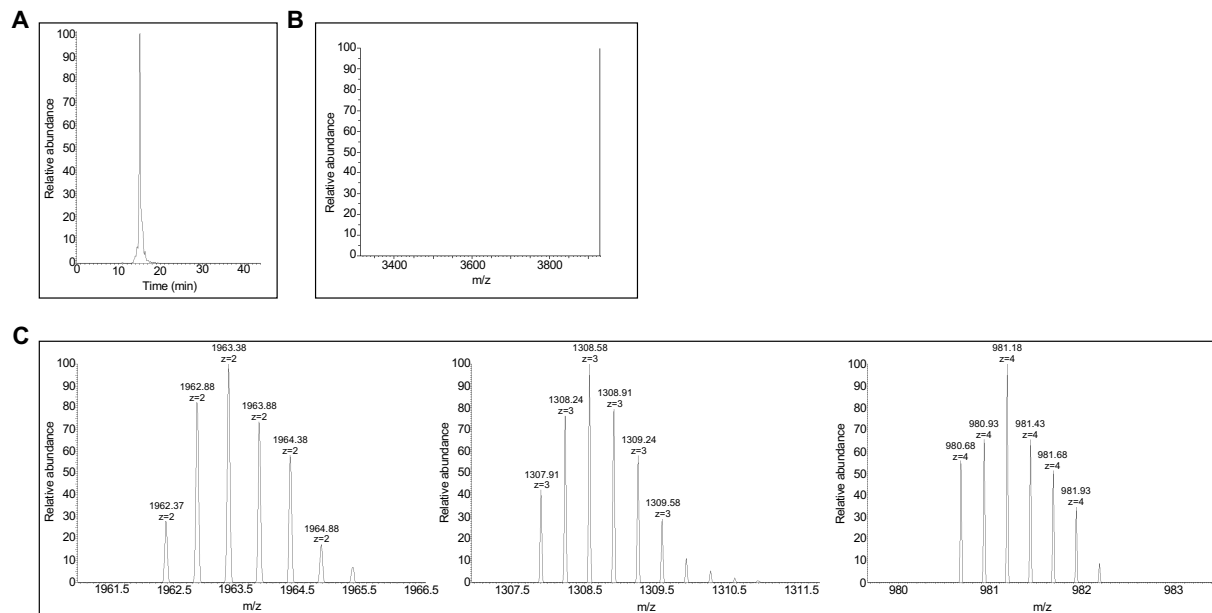

**Figure S9.**

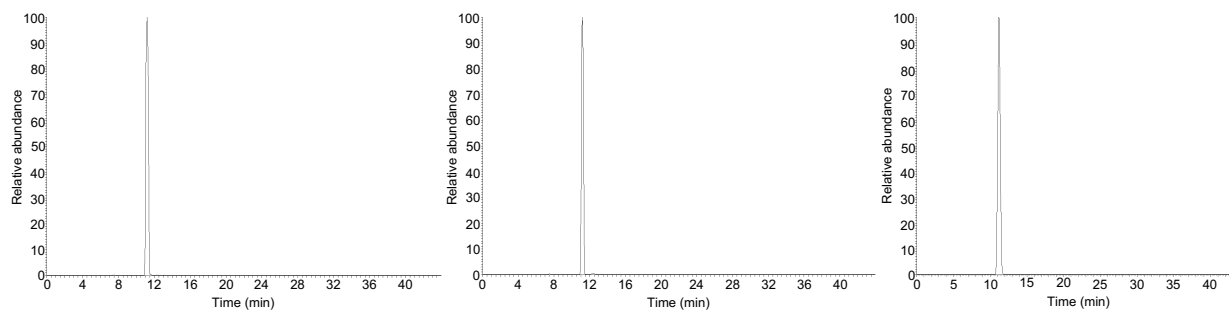

Figure S10.

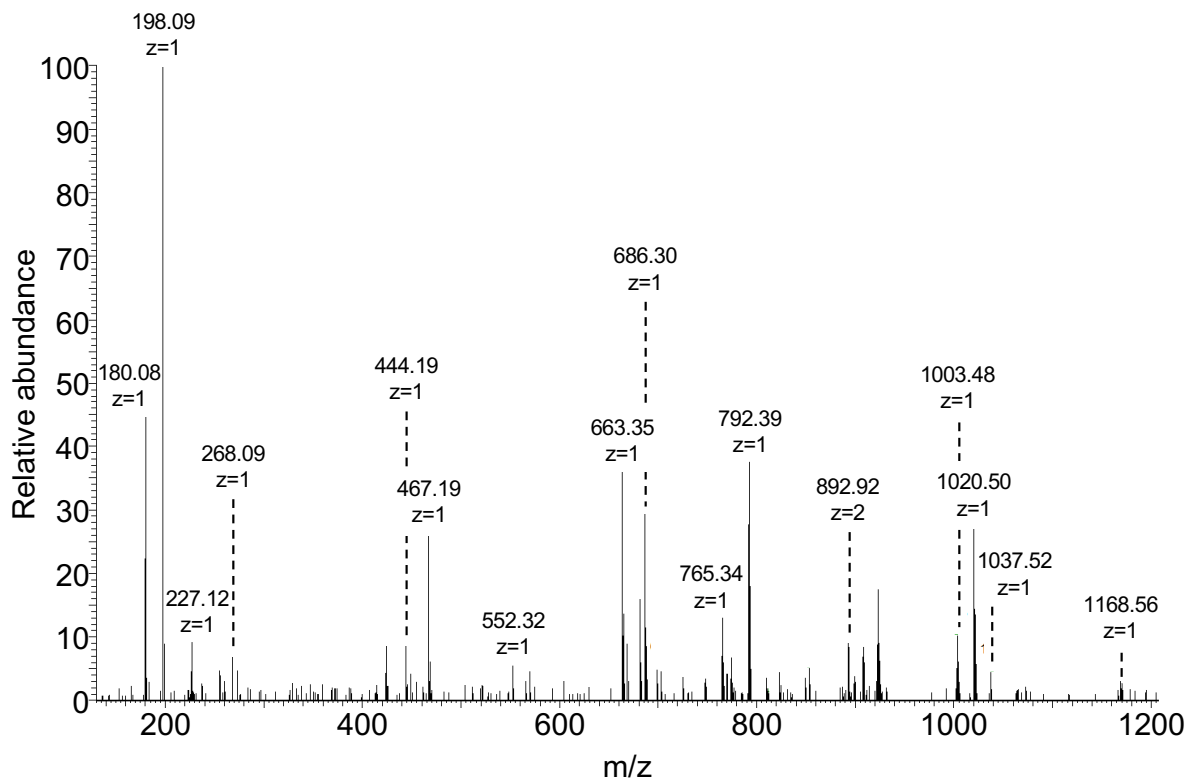

Figure S11.

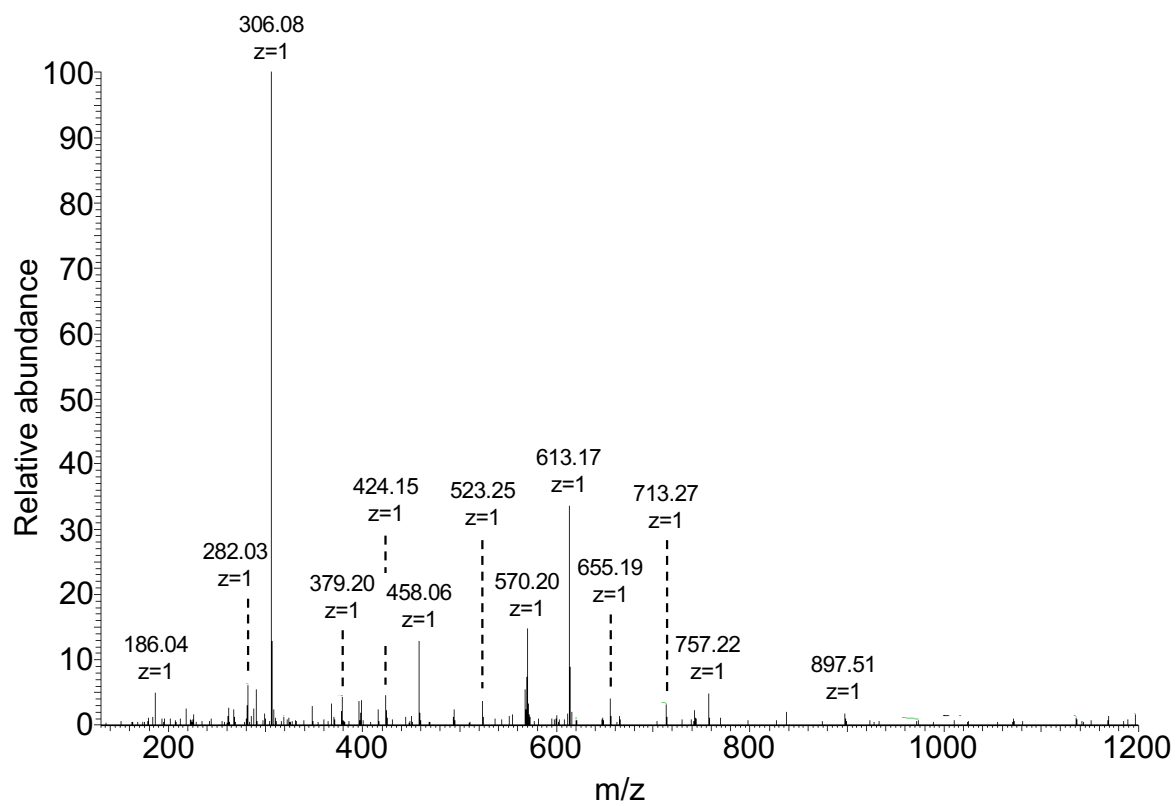

Figure S12.

**A**

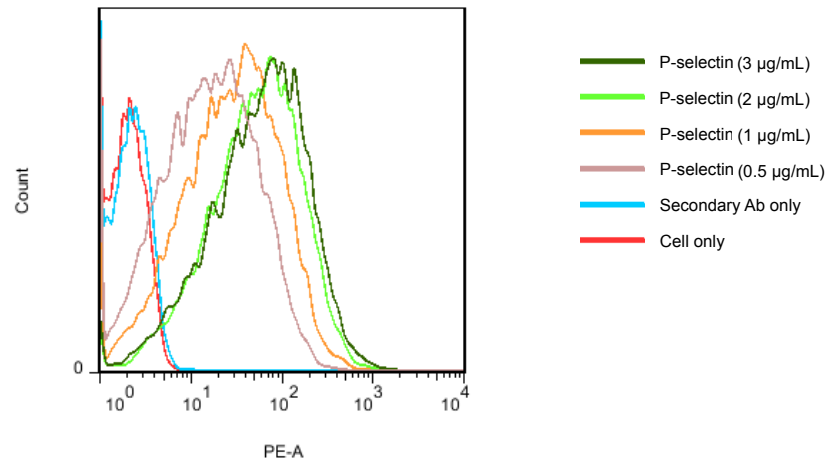

**B**

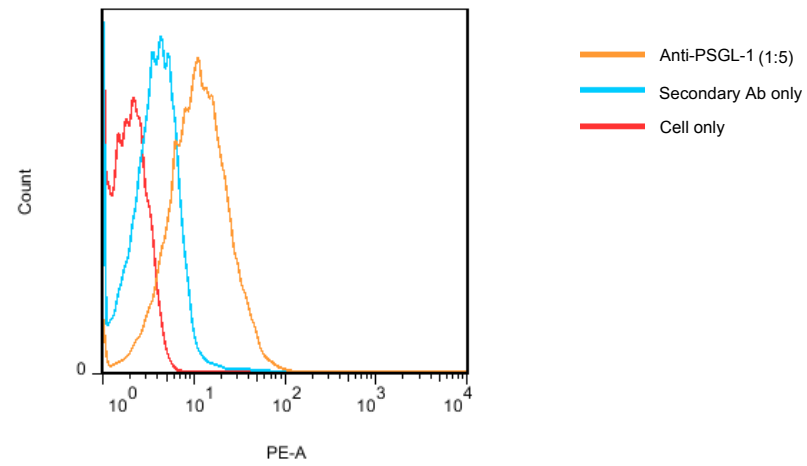

**C**

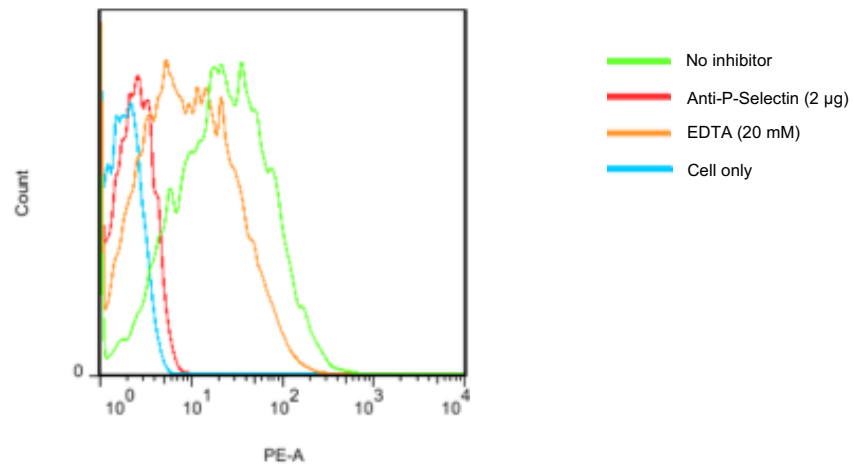

Supplement: d4ra05000b1.pdf [file d4ra05000b1.pdf]
